# Supplementary material for: Tuning the surface properties of AuPd nanoparticles for adsorption of O and CO
Source: Royal Society of Chemistry journal article supplement (doi:10.1039/d3cp03213b), 2023-01-01
Supplement: d3cp03213b1.pdf [file d3cp03213b1.pdf]

# Supporting Information

## Tuning the Surface Properties of AuPd Nanoparticles for Adsorption of O and CO

Ilya V. Chepkasov,<sup>\*,†,‡</sup> Ivan S. Zamulin,<sup>‡</sup> Viktor S. Baidyshev,<sup>†</sup> and Alexander G.  
Kvashnin<sup>†</sup>

<sup>†</sup>*Skolkovo Institute of Science and Technology, 30 Bolshoy Boulevard, Bld. 1, Moscow  
121205, Russian Federation*

<sup>‡</sup>*Katanov Khakas State University, 90 Lenin pr., 655017, Abakan, Russian Federation*

E-mail: I.Chepkasov@skoltech.ru

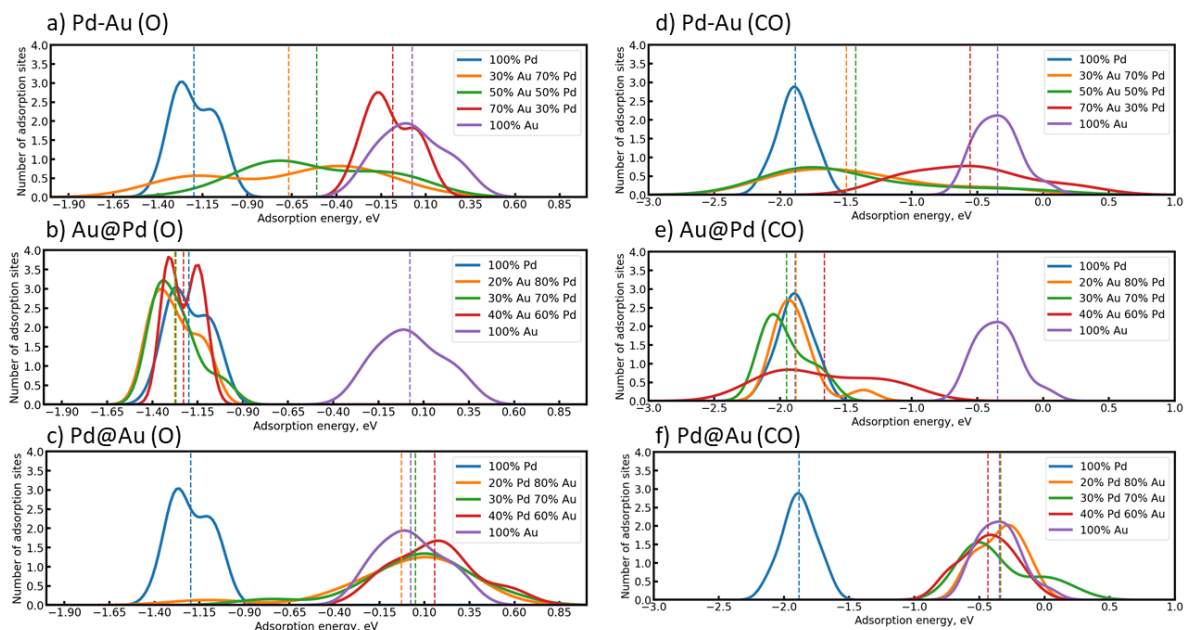

Figure S1: Distributions of adsorption energies of O and CO species calculated for 14 symmetrical nonequivalent adsorption sites on fcc alloy and core-shell Pd@Au and Au@Pd nanoparticles and alloy Pd-Au nanoparticles. The distributions were obtained by applying 0.35 eV smearing to the calculated adsorption energies. The dashed lines reflect the average adsorption energies calculated for each distribution.

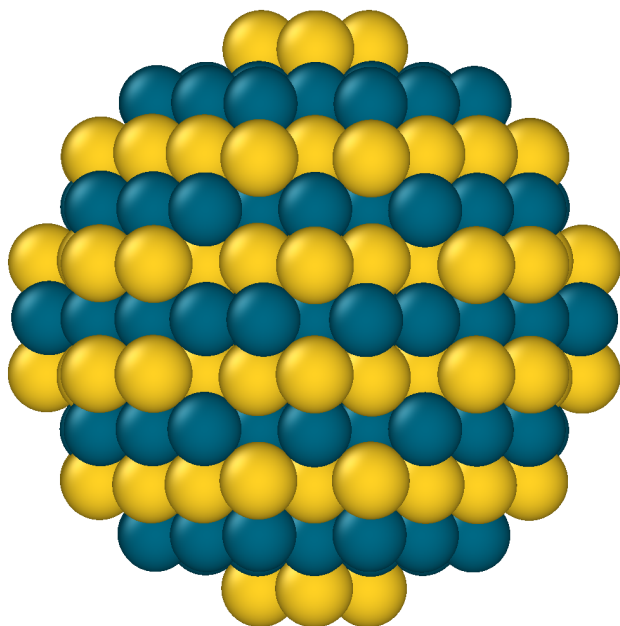

Figure S2: PdAu nanoparticle with L1<sub>1</sub> structure

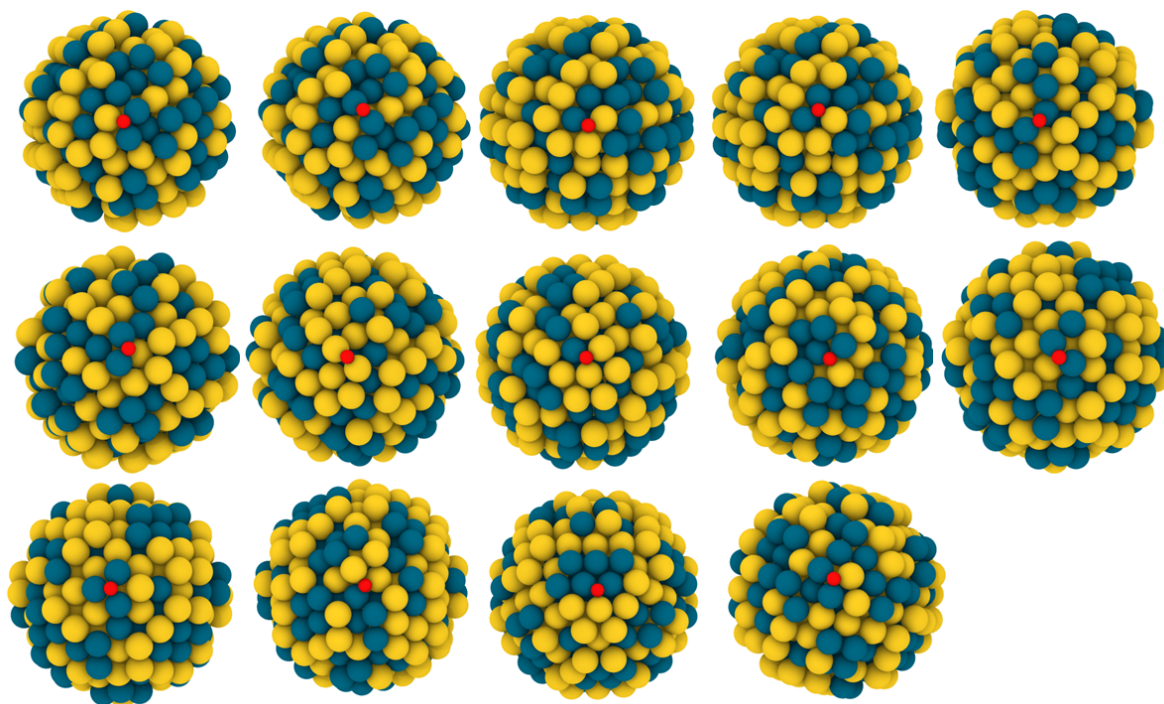

Figure S3: Adsorption sites for O

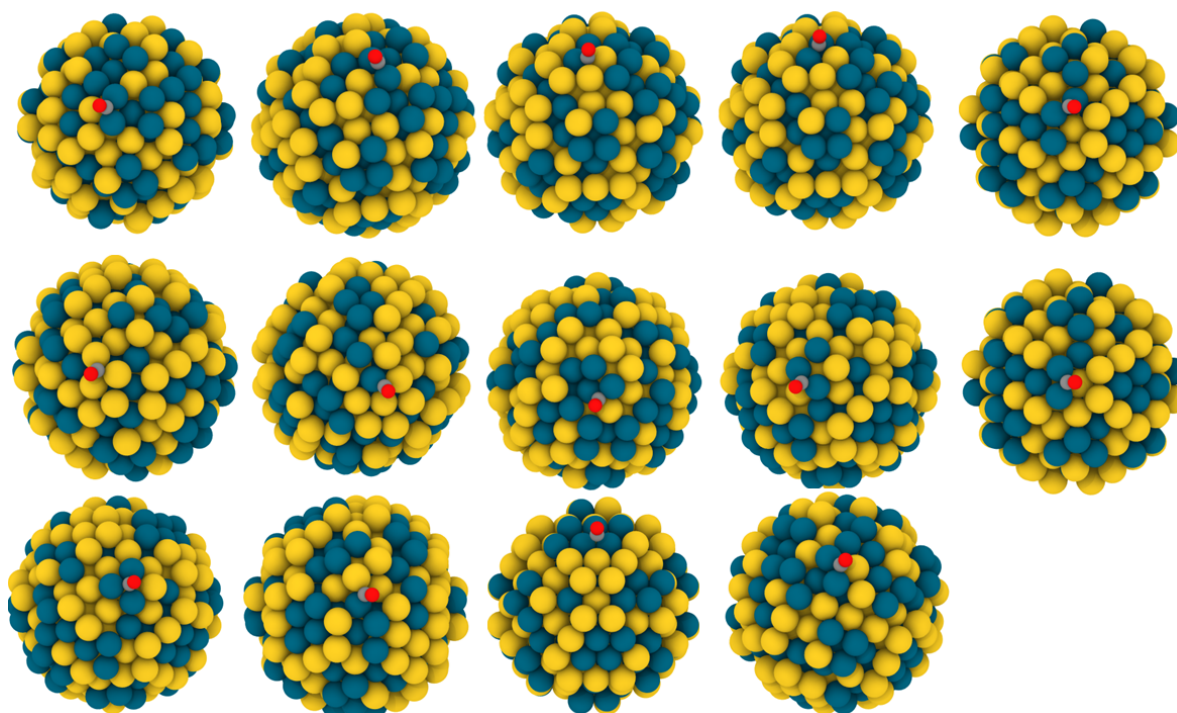

Figure S4: Adsorption sites for CO
